# Supplementary material
Source: PubMed Central journal article supplement (PMC404054)

|   |   |   |   |                          |
|---|---|---|---|--------------------------|
| + | - | - | - | BofA                     |
| - | - | + | - | GFP $\Delta$ 27BofA WT   |
| - | - | - | + | GFP $\Delta$ 27BofA H57F |
| - | - | - | - | SpoIVB                   |

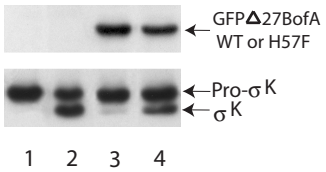

Supplement: pnas_101_17_6385__4.pdf [file pnas_101_17_6385__4.pdf]
